# Supplementary material for: Understanding the influence of carbon addition on the corrosion behavior and mechanical properties of Al alloy “covetics”
Source: Springer Nature journal article supplement (doi:10.1007/s10853-018-2998-5), 2018-10-16
Supplement: 10853_2018_2998_MOESM1_ESM.pdf [file 10853_2018_2998_MOESM1_ESM.pdf]

# **Understanding the influence of carbon addition on the corrosion behavior and mechanical properties of Al alloy “covetics”**

Jason A. Varnell,<sup>1</sup> Mete Bakir,<sup>2</sup> Angela M. DiAscro,<sup>1</sup> Xinyi Chen,<sup>1</sup> Sabrina Nilufar,<sup>3</sup> Iwona Jasiuk,<sup>2,\*</sup> and Andrew A. Gewirth<sup>1,\*</sup>

<sup>1</sup>Department of Chemistry, University of Illinois at Urbana-Champaign, Urbana, Illinois 61801, United States

<sup>2</sup>Department of Mechanical Science and Engineering, University of Illinois at Urbana-Champaign, Urbana, Illinois 61801, United States

<sup>3</sup> Department of Mechanical Engineering and Energy Processes Engineering, Southern Illinois University, Carbondale, Illinois 62901, United States

\*corresponding authors

Supporting Figures & Tables:

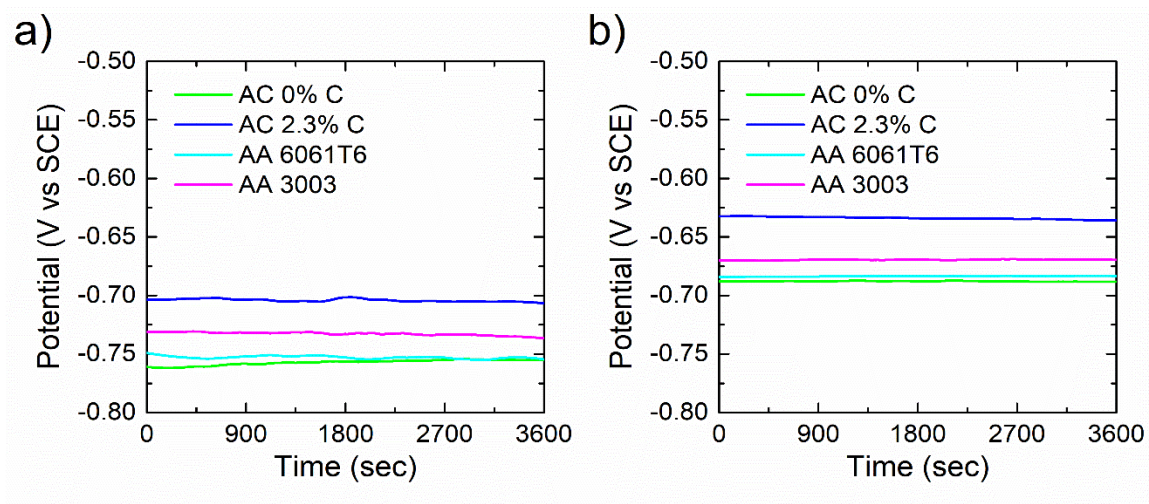

Figure S1. Open circuit potential (OCP) recorded for 60 minutes in 1M NaCl (a) and 0.1M HCl (b).

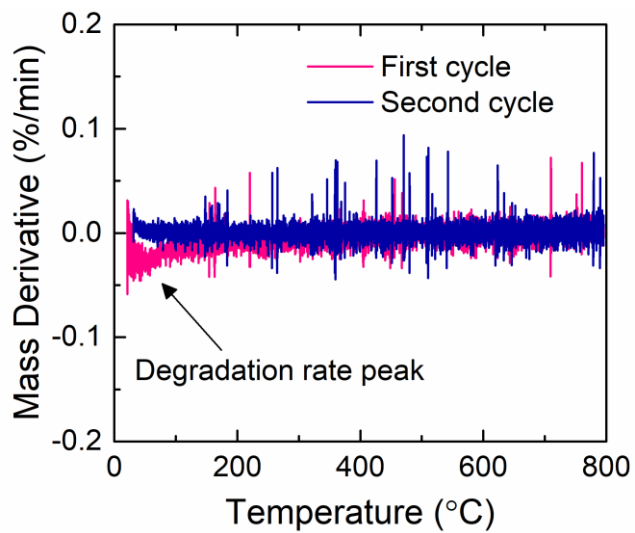

Figure S2. Degradation rate (DTG) curves for the 2.3% covetic.

Table S1. Corrosion potentials obtained from averaging OCP values over the final 30 minutes of measurement.

| <b>Aluminum Alloy Sample</b> | <b>E<sub>OCP</sub> NaCl (V vs SCE)</b> | <b>E<sub>OCP</sub> HCl (V vs SCE)</b> |
|------------------------------|----------------------------------------|---------------------------------------|
| Al 3003                      | -0.74                                  | -0.67                                 |
| Al 6061 T6                   | -0.75                                  | -0.68                                 |
| Al Covetic 0% C              | -0.75                                  | -0.69                                 |
| Al Covetic 2.3% C            | -0.70                                  | -0.64                                 |

Table S2. Comparison of corrosion potentials for reference materials obtained by averaging OCP values over the final 30 minutes of measurement and given values from literature using the same method.

| <b>Aluminum Alloy Sample</b> | <b>Measured E<sub>OCP</sub> NaCl (SCE)</b> | <b>Reference E<sub>OCP</sub> NaCl (SCE)[1]</b> |
|------------------------------|--------------------------------------------|------------------------------------------------|
| Al 3003                      | -0.74                                      | -0.74                                          |
| Al 6061 T6                   | -0.75                                      | -0.74                                          |

**References:**

- [1] T.D. Burleigh, R.C. Rennick, F.S. Bovard, Technical note: Corrosion potential for aluminum alloys measured by ASTM G 69, CORROSION, 49 (1993) 683-685.
